# Supplementary material for: Effects of Cybersickness Mitigation Methods on Behavior: A Comparative Study Based on the Skill–Rule–Knowledge Model
Source: Research Square preprint supplement (doi:10.21203/rs.3.rs-3759513/v1), 2023-12-19
Supplement: Supplementary file 1 [file 81ca48769a8d0deaa79d41dc.xlsx]

## Sheet: Data
	Skill-based						Rule-based						Knowledge-based
	BL		DB		DFOV		BL		DB		DFOV		BL		DB		DFOV
	M	SD	M	SD	M	SD	M	SD	M	SD	M	SD	M	SD	M	SD	M	SD
Performance1	71.38	26.78	60.31	29.25	68.95	26.88	5.78	2.18	6.22	1.96	6.17	2.48	3.83	1.62	3.83	1.42	3.89	2.05
ARA [m/s^2]	131.35	27.7	140.57	33.36	127.34	23.28	220.12	134.59	220.63	134.05	230.01	131.9	335.03	177.84	335.07	141	341.92	203.68
dSSQ-TS	3.12	4.84	6.65	9.65	-1.25	13.27	4.57	6.73	4.16	13.39	0	13.02	5.61	7.83	7.27	16.6	0.62	16.39
dSSQ-N	5.3	16.76	12.19	17.86	-1.59	24.1	12.19	18.74	7.42	26.78	7.42	21.35	19.08	22.67	19.61	33.29	-2.65	35.06
dSSQ-O	6.32	13.82	8.84	16.7	-3.79	29.79	13.48	18.49	8	31.03	0	26.77	14.74	19.19	15.58	40.82	-0.42	38.25
dSSQ-D	11.6	18.02	24.75	35.91	-4.64	49.39	17.01	25.06	15.47	49.82	0	48.46	20.88	29.14	27.07	61.79	2.32	61
Table 1:	Measurements of task performances, ∆SSQ scores, and average rotational acceleration in terms of mean and standard deviation
1The unit of measure for the performance differed; it was seconds for the skill-based task and there was no unit for the other two.

## Sheet: Author information
Article Title:	Effects of cybersickness mitigation methods on behavior: a comparative study based on the skill–rule–knowledge model
Journal Name:	Virtual Reality
Author names:	Shuaixin Qi, Marino Menozzi
Affiliation:	Department of Health Sciences and Technology, ETH Zurich
Corresponding e-mail:	qis@ethz.ch
